# 1 MAGIC: A label-free fluorescence method for 3D high-resolution 2 reconstruction of myelinated fibers in large volumes

3 Irene Costantini<sup>1,2\*</sup>, Enrico Baria<sup>1,3</sup>, Michele Sorelli<sup>1,4</sup>, Felix Matuschke<sup>5</sup>, Francesco Giardini<sup>1,3</sup>, Miriam Menzel<sup>5</sup>,  
4 Giacomo Mazzamuto<sup>2,1</sup>, Ludovico Silvestri<sup>1,3</sup>, Riccardo Cicchi<sup>2,1</sup>, Katrin Amunts<sup>5,6</sup>, Markus Axer<sup>5</sup>, Francesco  
5 Saverio Pavone<sup>1,2,3</sup>

6 <sup>1</sup>European Laboratory for Non-linear Spectroscopy, University of Florence, Italy,

7 <sup>2</sup>National Institute of Optics, National Research Council, Italy,

8 <sup>3</sup>Department of Physics, University of Florence, Italy,

9 <sup>4</sup>Department of Information Engineering, University of Florence, Italy,

10 <sup>5</sup>Institute of Neuroscience and Medicine (INM-1), Research Centre Jülich, Jülich, Germany,

11 <sup>6</sup>C. and O. Vogt Institute for Brain Research, University Hospital Düsseldorf, Heinrich-Heine University Düsseldorf,  
12 Germany

13 \*corresponding author

## 14 Abstract

15 Analyzing the structure of neuronal fibers with single axon resolution, in large volumes, remains an  
16 unresolved challenge in connectomics. Here, we propose MAGIC (Myelin Autofluorescence imaging by  
17 Glycerol Induced Contrast enhancement), a simple tissue preparation method to perform label-free  
18 fluorescence imaging of myelinated fibers. We demonstrate its broad applicability by performing mesoscopic  
19 reconstruction at sub-micron resolution of mouse, rat, monkey, and human brain samples and by quantifying  
20 the different fiber organization in Control and Reeler mouse's hippocampal sections.

## 21 Main

22 The brain is a complex organ constituted by highly interconnected units, the neurons, capable of storing and  
23 processing information from a myriad of different inputs regulating most human activities. The aim of  
24 connectomics consists in reconstructing the intricate organization of the connections between brain regions  
25 at macro- to mesoscales, but also between individual neurons at the microscale. Most long-range projecting  
26 axons are wrapped by a myelin sheath to permit a reliable and efficient signal transmission<sup>1</sup>. Several methods  
27 have been developed to map the network of interneuronal connections; still, they are limited by the volume  
28 that they can analyze (Electron Microscopy)<sup>2</sup>, by the spatial resolution achievable (MRI)<sup>3</sup> or by the

29 sophisticated equipment needed for the measurement (CARS, THG microscopy)<sup>4</sup>. Optical methods have the  
30 potential for scalable large-area high-resolution mapping. However, they need a source of contrast to detect  
31 the structure of interest. In this respect, myelin staining is an unmet technical challenge. Exogenous dyes<sup>5</sup>  
32 are used to stain fibers composing the white matter, but nonspecific binding and inefficient diffusion of dyes  
33 hinder single fiber imaging in large volumes.

34 To meet this need, we develop MAGIC (Myelin Autofluorescence imaging by Glycerol Induced Contrast  
35 enhancement), a simple label-free method that opens the possibility of performing sub-micron resolution  
36 fluorescence imaging of myelinated fibers in 3D at the mesoscale level. MAGIC is a methodology that enables,  
37 with a glycerol-based procedure, to enhance myelin's autofluorescence, allowing the use of conventional  
38 fluorescence microscopy techniques to investigate neuronal filament organization. Glycerol has been widely  
39 used as a mounting and refractive index matching medium because of its biocompatibility<sup>6</sup>. We implemented  
40 the MAGIC protocol from the observation that the removal of glycerol from previously fixed and embedded  
41 tissue allows for the specific enhancement of myelin autofluorescence. MAGIC includes three steps (Figure  
42 1a): fixation with paraformaldehyde (PFA), embedding in glycerol (Gly), and removal of glycerol by washing  
43 in saline solution (MAGIC). During the procedure, myelinated fibers undergo a specific increase of  
44 fluorescence efficiency, allowing for high-resolution 3D reconstruction of the axons (Figure 1b,  
45 Supplementary Video 1). The number of emitted photons rises significantly during the different steps of the  
46 protocol (Figure 1c). In PFA, we observed a negative contrast between fibers and surrounding tissue  
47 fluorescence; instead, after the MAGIC protocol, the contrast becomes positive and is significantly increased  
48 due to the raising of myelinated fiber autofluorescence (Figure 1d). The protocol does not introduce any  
49 exogenous fluorophores and is based on the local enhancement of autofluorescence from endogenous  
50 molecules. The fluorescence emitted from the myelinated fibers can be detected not only with two-photon  
51 excitation but also with conventional one-photon microscopy. Supplementary figures display images  
52 acquired with a commercial confocal microscope at various wavelengths (Supplementary Figure 1) and from  
53 various species (Supplementary Figure 2). We demonstrate that the MAGIC protocol can provide details of

54 myelin substructures (Supplementary Figure 3) using a high-magnification objective and that it is also  
55 compatible with conventional immunofluorescence (Supplementary Figure 4, Supplementary Video 2 and 3).  
56 The spectral analysis of fluorescence signals reveals that the emission spectrum is not altered throughout the  
57 steps of the protocol (Figure 1e). Nevertheless, the fluorescence signal from myelinated fibers is specifically  
58 enhanced by MAGIC, as proved by the correlation with a mouse brain section labeled with an exogenous dye  
59 specific for myelin staining: FluoroMyelin™ red<sup>7</sup>. The signal emitted by the dye perfectly overlaps the fibers'  
60 autofluorescence signal, indicating that the fluorescence is indeed coming from myelin (Figure 1f).

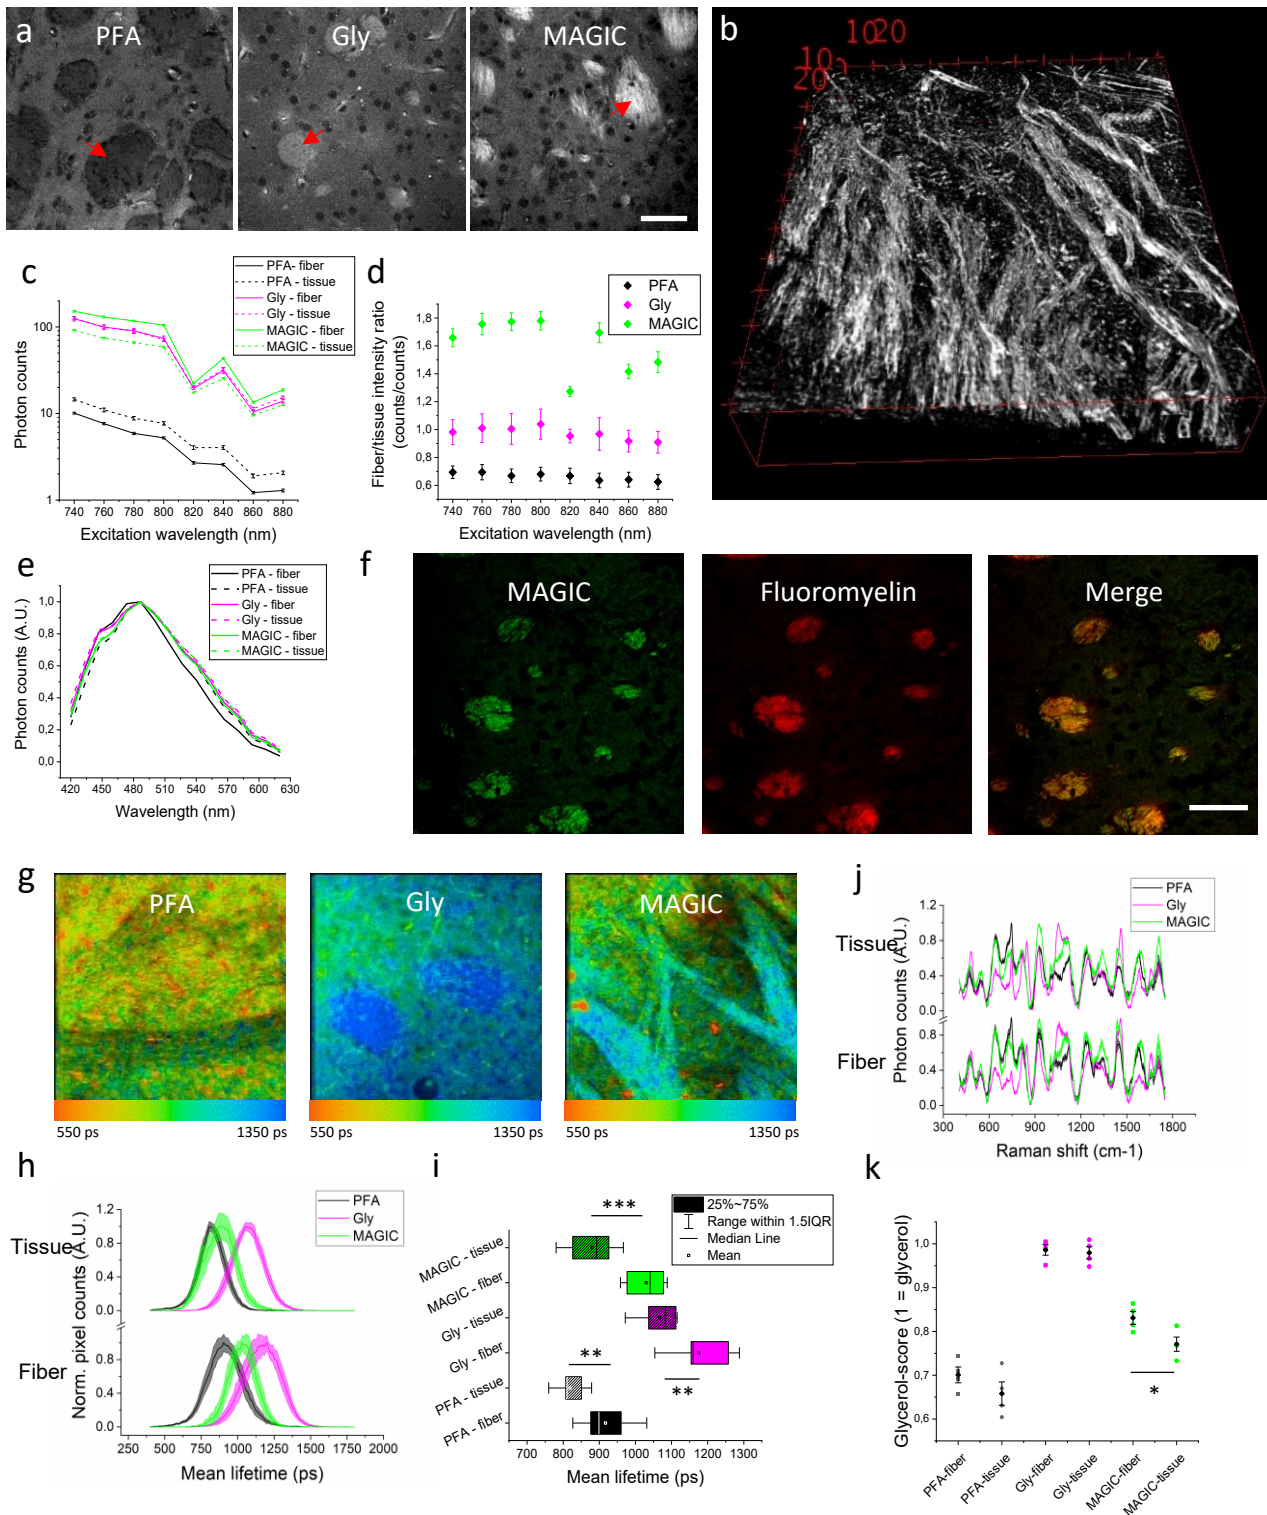

61

62 **Figure 1. MAGIC: a method to perform label-free fluorescence imaging of myelinated fibers** (a) Representative TPFM  
 63 images of the caudate putamen of a mouse brain section during the three subsequent steps of the MAGIC protocol:  
 64 fixation (PFA), glycerolization (Gly), and washing (MAGIC). Red arrows indicate fiber bundles. Scale bar = 50  $\mu$ m. (b) 3D  
 65 reconstruction of myelinated fibers, imaging performed with TPFM at the resolution of (0.44 x 0.44 x 1)  $\mu$ m<sup>3</sup>. Box scale  
 66 = 10  $\mu$ m. (c) Measurement (mean  $\pm$  std.err) of photons emitted by the myelinated fibers (fiber) and the surrounding  
 67 tissue (tissue) during the different steps of the protocol (PFA, Gly, MAGIC) detected at different excitation wavelengths.  
 68 (d) Intensity contrast (mean  $\pm$  std.err) observed at different excitation wavelengths during the three steps of the MAGIC  
 69 protocol. (e) Fluorescence emission spectra of the different samples excited with TPFM at 800 nm. (f) Images of a mouse  
 70 brain section treated with MAGIC and labeled with FluoroMyelin<sup>TM</sup> red. In green and red respectively, the

71 autofluorescence and the exogenous signals are shown. Images were obtained with TPFM, scale bar = 50  $\mu\text{m}$ . (g) FLIM  
72 representative images during the three steps of the MAGIC protocol. Lifetime color scale is set from 550 to 1350 ps. (h)  
73 Fluorescence lifetime distributions (mean  $\pm$  std.err) of fiber and tissue during the MAGIC steps. (i) Box chart plot of  
74 fluorescence lifetime values. (j) Raman spectra (mean  $\pm$  std.err) of fiber and tissue during the MAGIC steps. (k) Glycerol  
75 scores (mean  $\pm$  std.err) calculated along with the three major bands (550, 850, and 1465  $\text{cm}^{-1}$ ) of the glycerol Raman  
76 spectrum. Statistical significance (t-test): \* $p < 0.05$ , \*\*  $p < 0.001$ , \*\*\*  $p < 0.0001$

77 To investigate the origin of the phenomenon, we analyzed the optical properties of mouse brain sections  
78 during the three steps of the protocol. Time-resolved analysis of the emitted photons, obtained with FLIM  
79 (Fluorescence-lifetime imaging microscopy)<sup>8</sup>, highlights a fluorescence lifetime increase after glycerolization.  
80 MAGIC modifies the dynamics of the fluorescence decay originating from fibers and tissue. The fluorescence  
81 lifetime of the tissue decreases at values comparable to those ones obtained from PFA samples (with only  
82  $60 \pm 30$  ps average difference), while that of the fibers remains at significantly higher values, resulting in a  
83  $110 \pm 40$  ps difference from the corresponding PFA lifetime distribution (Figure 1g, 1h, and 1i). These findings  
84 suggest that the change of the molecular environment surrounding the fluorescent molecules occurs  
85 differently inside and outside the fibers. To further characterize this phenomenon, we used Raman  
86 spectroscopy<sup>9</sup> as a tool to probe molecular content and to prove the involvement of glycerol in the  
87 fluorescence emission enhancement of myelinated fibers (Figure 1j). Glycerolized tissue spectra are  
88 characterized by the addition of glycerol Raman peaks around 485, 550, 850, 925, 1060, and 1465  $\text{cm}^{-1}$   
89 (Supplementary Figure 5a), as compared to PFA samples; such spectral signatures typical of glycerol  
90 disappear in the surrounding tissue after MAGIC, whereas they are preserved within myelinated fibers.  
91 Conversely, no DMSO contributions (present in the first step of the protocol to enhance the penetration of  
92 glycerol) were detected from the Raman spectra (Supplementary Figure 5b). A more detailed analysis based  
93 on the main Raman bands of glycerol was performed to quantitatively evaluate the involvement of glycerol  
94 in the process (Figure 1k). After MAGIC, myelinated fibers show, on average, a significantly smaller decrease  
95 ( $\sim 16\%$ ) in the intensity of glycerol-related Raman peaks with respect to the surrounding tissue ( $\sim 21\%$ ). All  
96 these findings indicate that the glycerol plays a central role in the MAGIC protocol. The higher fluorescence  
97 lifetime measured in the fibers suggests an anti-quenching effect. Raman spectroscopy proves the  
98 involvement of glycerol in the fluorescence emission of myelinated fibers. In conclusion, the fluorescence  
99 enhancement could be due to the glycerol that remains confined inside the myelinated fibers after MAGIC  
100 due to its higher affinity<sup>10</sup> to this structure with respect to the surrounding tissue.

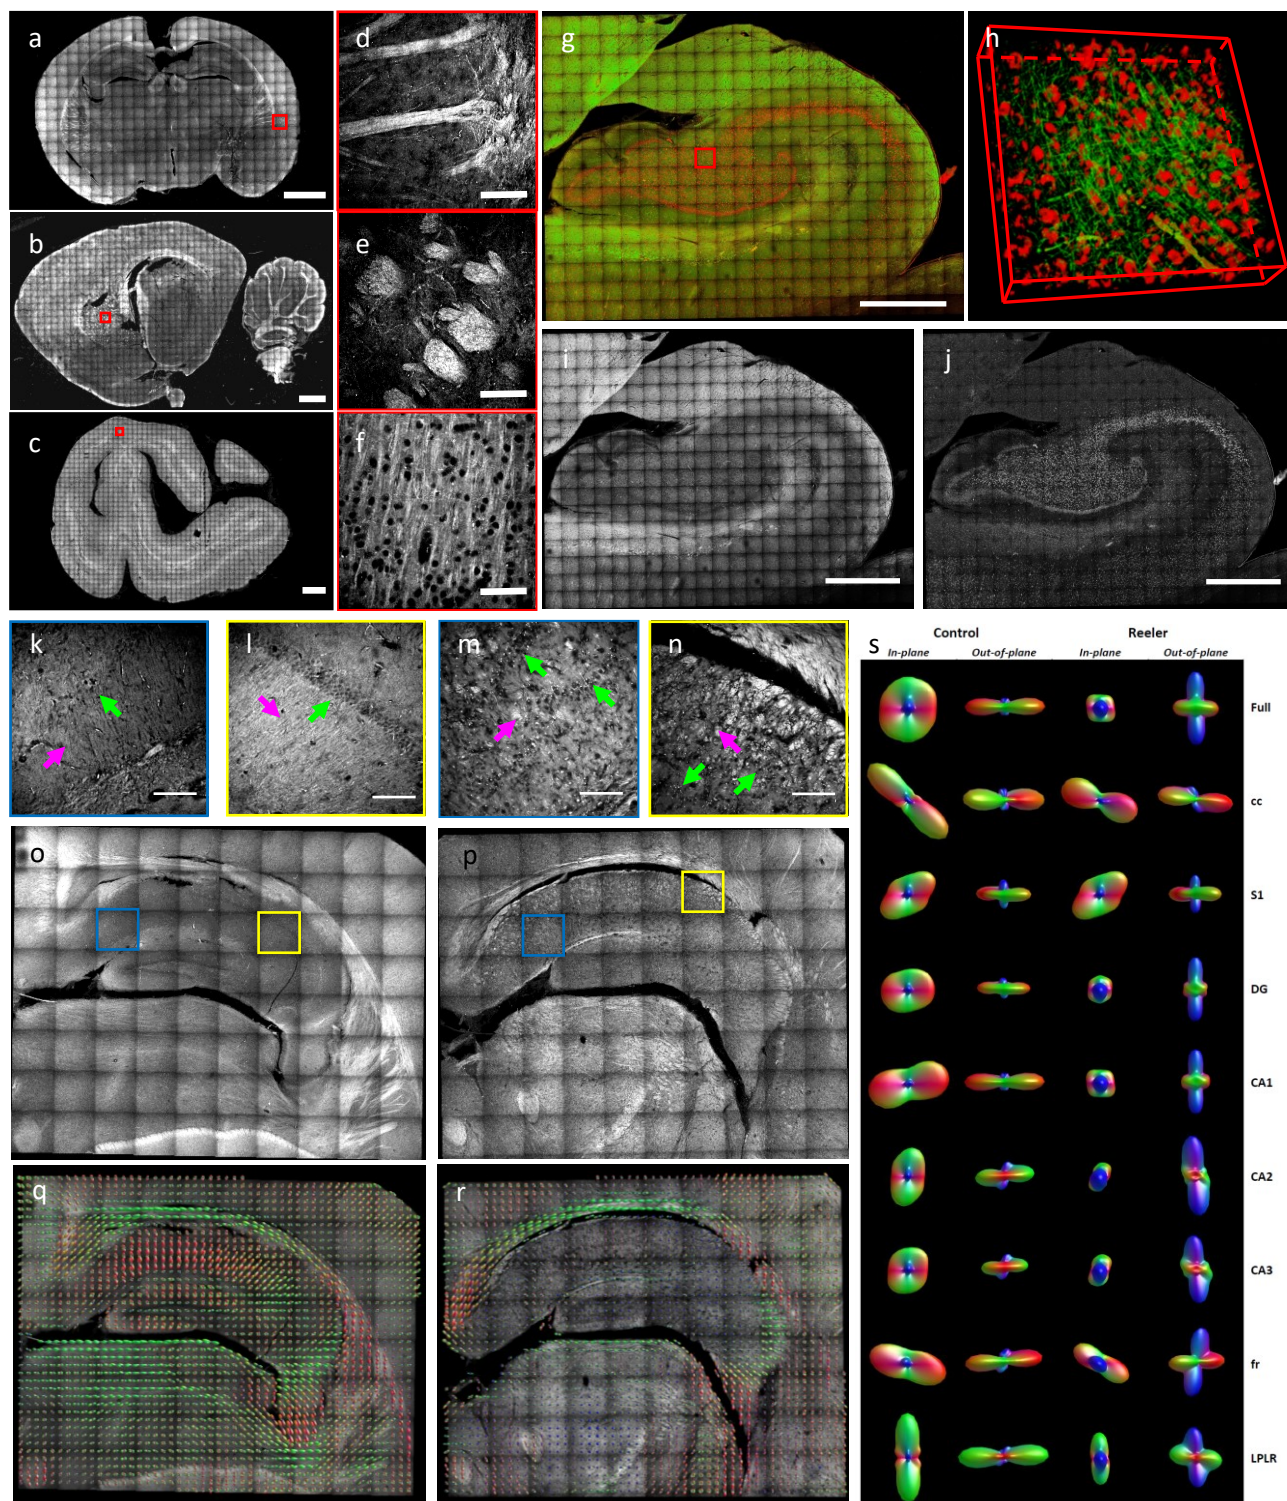

102 **Figure 2. Mesoscopic 3D reconstruction and quantification with MAGIC.** Maximum intensity projection (MIP) of the  
103 mesoscale reconstruction of 60- $\mu\text{m}$ -thick brain sections treated with MAGIC: mouse (a), rat (b), and vervet monkey (c),  
104 respectively. Scale bar = 1 mm. (d, e, f) Magnified inset corresponding respectively to the red boxes in a, b, c. Scale bar  
105 = 50  $\mu\text{m}$ . (g) MIP of the mesoscale reconstruction of a human hippocampus 60- $\mu\text{m}$ -thick coronal section. Scale bar = 1  
106 mm. (h) 3D rendering (450 x 450 x 60  $\mu\text{m}^3$ ) of the stack indicated by the red box in g. (i) Green channel showing the  
107 myelinated fibers enhanced by MAGIC. (j) The red channel of the MIP in g showing the cells' bodies autofluorescence  
108 produced by lipofuscin pigments. (k, l, m, n) Magnified inset of blue and yellow boxes in q and r, respectively. Green  
109 arrows point to neuronal cell bodies, magenta arrows to myelinated fibers. Scale bar = 50  $\mu\text{m}$ . (o, p) MIP of the  
110 mesoscale reconstructions of a control and Reeler mouse hippocampus 60- $\mu\text{m}$ -thick coronal section. Scale bar = 1 mm.  
111 (q, r) Images show the ODF maps obtained from analyzing the full 3D hippocampus reconstruction of the Control and  
112 the Reeler mouse, sampling 16 vectors for each ODF. (s) In-plane and out-of-plane orientation of the single ODF obtained  
113 by analyzing all the vectors of the full mosaic reconstructions and each of its ROIs. Acronyms list = Full: full field of view;  
114 cc: Corpus Callosum; S1: Primary Somatosensory Cortex; DG: Dentate Gyrus; CA1, CA2, CA3: field CA1, CA2, CA3 of  
115 hippocampus; fr: Fasciculus Retroflexus; LPLR: Lateral Posterior Thalamic Nucleus.

116 A significant advantage of the MAGIC protocol is its widespread applicability due to the fact that glycerol is a  
117 very common biocompatible mounting medium for tissue samples. MAGIC is highly versatile and can be  
118 successfully applied to a wide variety of samples. Brain sections from different mammal species: mouse  
119 (Figure 2a, 2d), rat (Figure 2b, 2e), vervet monkey (Figure 2c, 2f), and, more importantly, humans (Figure 2g,  
120 2h, 2i, 2j) can be imaged after being treated with the protocol. Interestingly, the presence of lipofuscin  
121 pigments<sup>11</sup> in the human brain sample allowed, in combination with MAGIC, the label-free detection and the  
122 3D reconstruction of neuronal fibers and cell bodies (Figure 2i, 2j, and Supplementary Video 4), obtaining a  
123 more comprehensive anatomical organization of the human hippocampus.

124 Finally, in order to demonstrate that the MAGIC protocol allows us to characterize the 3D tissue anatomy,  
125 we compared the structural organization of different regions of the hippocampus from a Control and a Reeler  
126 mouse. Reeler mouse (Reelin deficient - RELN<sup>-/-</sup> Reeler) is a well-known animal model for several  
127 neurological and neurodegenerative disorders<sup>12,13</sup>. In the Reeler sample, the organization of neuronal cell  
128 bodies and fibers is different compared to that of the Control mouse (Figure 2k, 2l, 2m, 2n). To quantify the  
129 observed alteration on the mesoscale reconstruction (Figure 2o, 2p), different regions of the mosaic were  
130 selected and manually segmented according to their anatomical classification (Supplementary Figure 6). A  
131 custom-made automatic Structure Tensor Analysis<sup>14</sup> tool followed by an Orientation Distribution Function  
132 (ODF)<sup>15</sup> evaluation of the derived vectors were applied to the full reconstruction and on each ROI (Figure 2q,  
133 2r, 2s, Supplementary Figure 7). We found that the primary peaks orientation of the Control mouse is mostly  
134 constituted by in-plane contributions in all the selected ROIs, while six out of eight areas of the Reeler sample  
135 are distributed in the out-of-plane direction (Figure 2s and Table 1). These findings demonstrate that the

136 Reeler mouse's inner connectivity of the hippocampus differs significantly from the fiber organization of a  
 137 normal mouse.

138 **Table 1. ODF components analysis.** Amplitude (a1, a2, a3) and main orientation (direction) of the significant ODF  
 139 components of both Control and Reeler mouse hippocampi are shown. Table cell is gray if the peak amplitude is <50%  
 140 of the primary peak. Acronyms list = Full: full field of view; S1: Primary Somatosensory Cortex; cc: Corpus Callosum; CA1,  
 141 CA2, CA3: field CA1, CA2, CA3 of hippocampus; DG: Dentate Gyrus; fr: Fasciculus Retroflexus; LPLR: Lateral Posterior  
 142 Thalamic Nucleus.

| ROI  | CONTROL MOUSE |                |           |                |              |                | REELER MOUSE |           |                |              |                |           |                |              |
|------|---------------|----------------|-----------|----------------|--------------|----------------|--------------|-----------|----------------|--------------|----------------|-----------|----------------|--------------|
|      | ODF Lobes     | a <sub>1</sub> | Direction | a <sub>2</sub> | Direction    | a <sub>3</sub> | Direction    | ODF Lobes | a <sub>1</sub> | Direction    | a <sub>2</sub> | Direction | a <sub>3</sub> | Direction    |
| Full | 3             | 0.14           | In-plane  | 0.14           | In-plane     | 0.09           | Out-of-plane | 3         | 0.16           | Out-of-plane | 0.11           | In-plane  | 0.11           | In-plane     |
| cc   | 1             | 0.35           | In-plane  |                |              |                |              | 1         | 0.26           | In-plane     |                |           |                |              |
| S1   | 2             | 0.20           | In-plane  | 0.12           | In-plane     |                |              | 3         | 0.17           | In-plane     | 0.11           | In-plane  | 0.11           | Out-of-plane |
| DG   | 1             | 0.16           | In-plane  |                |              |                |              | 1         | 0.19           | Out-of-plane |                |           |                |              |
| CA1  | 1             | 0.23           | In-plane  |                |              |                |              | 2         | 0.18           | Out-of-plane | 0.09           | In-plane  |                |              |
| CA2  | 1             | 0.18           | In-plane  |                |              |                |              | 1         | 0.24           | Out-of-plane |                |           |                |              |
| CA3  | 2             | 0.15           | In-plane  | 0.08           | Out-of-plane |                |              | 1         | 0.20           | Out-of-plane |                |           |                |              |
| fr   | 1             | 0.23           | In-plane  |                |              |                |              | 2         | 0.21           | Out-of-plane | 0.18           | In-plane  |                |              |
| LPLR | 1             | 0.30           | In-plane  |                |              |                |              | 2         | 0.18           | Out-of-plane | 0.16           | In-plane  |                |              |

143 To conclude, the methodology presented here demonstrated the possibility of reconstructing the  
 144 organization of myelinated fibers over large volumes in 3D at sub-micron resolution, enabling the study of  
 145 the brain anatomy in both physiological and pathological conditions, thus offering a reliable method for  
 146 integrated quantitative analyses. The versatility and simplicity of MAGIC will enable easy implementation of  
 147 the technique in many laboratories, offering the possibility of using 3D investigation for routine analysis. We  
 148 believe that MAGIC will help to have a more profound comprehension of the brain structure, bringing a  
 149 significant impact on neuroscience.

## 150 Methods

### 151 Specimen collection

152 The investigated brain sections were obtained from postmortem brains from different species: mouse  
 153 (control C57BL/6 and Reelin-deficient mouse model - RELN<sup>-/-</sup> Reeler, male, six months old), rat (Wistar, male,  
 154 three months old), vervet monkey (African green monkey: *Chlorocebus aethiops sabaeus*, male, between  
 155 one and two years old), and human (male, 87 years). The procedures for rodents were approved by the



156 institutional animal welfare committee at Forschungszentrum Jülich GmbH, Germany, and were in  
157 accordance with the European Union guidelines for the use and care of laboratory animals. All methods were  
158 carried out in accordance with relevant guidelines and regulations. The vervet monkey tissue sample was  
159 acquired in the project “Postnatal development of cortical receptors and white matter tracts”  
160 (4R01MH092311-05) funded by the NIMH of the National Institutes of Health. The project was carried out in  
161 accordance with the UCLA Chancellor’s Animal Research Committee ARC #2011-135 and by the Wake Forest  
162 Institutional Animal Care and Use Committee IACUC #A11-219. The human brain was acquired in accordance  
163 with the ethics committee at the Medical Faculty of the University of Rostock, Germany #A2016-0083.

#### 164 **MAGIC preparation protocol**

165 Brains from different species (mouse, rat, vervet, and human) were fixed with 4% paraformaldehyde (PFA)  
166 solution at 4°C for several weeks (human brain: >3 months, vervet, rat, and mouse brains: 1–2 weeks). The  
167 brains were embedded first in a 10% glycerol, 2% DMSO, 4% formaldehyde solution at +4°C, then in a 20%  
168 glycerol, 2% DMSO, 4% formaldehyde solution at +4°C for mouse and rat brains 7 days in total, while for  
169 vervet and human brains  $\geq 3$  weeks. After treatment with 2% dimethyl sulfoxide for cryoprotection, brains  
170 were dipped in cooled isopentane (-50°C) for several minutes (mouse and rat brains: >5min, human and  
171 vervet brains: >30min). The frozen brains were cut with a cryostat microtome (Leica Microsystems, Germany)  
172 at a temperature of -30°C into sections of approximately 60  $\mu\text{m}$  thickness. Brains were cut along one of three  
173 mutually orthogonal, anatomical planes: coronal, horizontal, or sagittal. Finally, the brain sections were  
174 incubated in a Phosphate Buffer Saline solution (PBS) 0.01M at room temperature (RT) for one month for  
175 mouse and rat brains and three months for vervet and human brains. Before imaging, the sections were  
176 mounted with PBS and coverslipped. For myelin characterization, the labeling was performed using the  
177 FluoroMyelin™ red dye (Thermo Fisher Scientific, cat. num. F34652): mouse brain sections were incubated  
178 in a solution of 1:300 FluoroMyelin™ in PBS for 20 minutes at room temperature. Then sections were rinsed  
179 3 times for 10 minutes each with PBS.

## 180 Fluorescence microscopy imaging

181 Fluorescence images were obtained using a commercial confocal microscope (Nikon Eclipse TE300 C2 LSCM,  
182 Nikon, Japan) equipped with a Nikon 60× or 100× immersion oil objective (Apo Plan, NA 1.4), and a custom-  
183 made two-photon fluorescence microscope (TPFM) at room temperature. Briefly, a mode-locked Ti: Sapphire  
184 laser (Chameleon, 120 fs pulse width, 90 MHz repetition rate, Coherent, CA) operating at 800 nm was coupled  
185 into a custom-made scanning system based on a pair of galvanometric mirrors (LSKGG4/M, Thorlabs, USA).  
186 The laser was focused onto the specimen by a refractive index tunable 25x objective lens (LD LCI Plan-  
187 Apochromat 25X/0.8 Imm Corr DIC M27, Zeiss, Germany) set either to glycerol or water. The imaged field of  
188 view was of  $450 \times 450 \mu\text{m}^2$ , the resolution employed was  $0.44 \times 0.44 \mu\text{m}^2$  or  $1.75 \times 1.75 \mu\text{m}^2$ . The system was  
189 equipped with a closed-loop XY stage (U-780 PLine® XY Stage System, Physik Instrumente, Germany) for the  
190 radial displacement of the sample and with a closed-loop piezoelectric stage (ND72Z2LAQ PIFOC objective  
191 scanning system, 2 mm travel range, Physik Instrumente, Germany) for the displacement of the objective  
192 along the z-axis. The fluorescence signal was collected by an independent GaAsP photomultiplier module  
193 (H7422, Hamamatsu Photonics, NJ). Emission filters of 482/35 nm and 618/50 nm were used for fibers and  
194 cell body detection, respectively.

## 195 Mesoscale reconstruction

196 To perform mesoscale reconstruction of the samples, the volume of interest was acquired with TPFM  
197 performing z-stack imaging of adjacent regions using a custom LabView program (National Instruments). The  
198 8-bit images ( $1024 \times 1024$  px or  $256 \times 256$  px) produced were saved in .tiff format. Each stack was acquired  
199 with a depth equal to the thickness of the section ( $50 \pm 10 \mu\text{m}$ ) and with a z step of 1 or 2  $\mu\text{m}$  between images.  
200 Each frame had a field of view of  $450 \times 450 \mu\text{m}^2$  and a pixel size of  $0.44 \times 0.44 \mu\text{m}^2$  or  $1.75 \times 1.75 \mu\text{m}^2$  for low-  
201 resolution reconstruction. The overlap of adjacent stacks was set as 40  $\mu\text{m}$ . The stitching of all the acquired  
202 stacks was performed using ZetaStitcher (G. Mazzamuto, "ZetaStitcher: a software tool for high-resolution  
203 volumetric stitching" <https://github.com/lens-biophotonics/ZetaStitcher>). Low-resolution reconstructions  
204 were performed on the mouse coronal section, the rat sagittal section, and on the vervet section. High-

205 resolution imaging was performed on the human hippocampus section and on the Reeler and control coronal  
206 section.

## 207 Photon counting and Fluorescence Lifetime Imaging Microscopy (FLIM) measurements

208 FLIM measurements were performed on different mouse brain sections (N=15) during the three conditions  
209 of the protocol (samples: PFA N=4, Gly N=6, and MAGIC N=5) using a custom-made multimodal setup<sup>16</sup>. The  
210 collected fluorescence was sent to a high-speed PMT for photon counting PMH-100 (Becker-Hickl GmbH,  
211 Berlin, Germany) and then processed by a single-photon counting FLIM board SPC-730 (Becker-Hickl GmbH)  
212 for time-resolved analysis. Analysis of the obtained FLIM images was performed using the software SPC  
213 Image 4.9.7 (Becker-Hickl GmbH, Berlin, Germany), fitting the fluorescence decay data with a double-  
214 exponential decay function. From each image, we selected ROIs (10 for PFA, 12 for Gly, 8 for MAGIC)  
215 corresponding to the myelin sheath and the surrounding brain tissue in order to analyze the distribution of  
216 their lifetime values separately. The photon-counting obtained from the same samples were also used to  
217 evaluate the fluorescence efficiency of the MAGIC protocol. We measured the fluorescence intensity at  
218 different excitation wavelengths (from 740 nm to 880 nm), and we normalized it to the square of the  
219 respective laser power. For each condition, we selected the maximum amount of 240  $\mu\text{m}^2$  ROIs detectable  
220 from the sample: 43 and 56 for PFA tissue and fibers respectively, 49 and 38 for Gly, 68 and 62 for MAGIC.  
221 Contrast evaluation was performed by dividing the fluorescence intensity detected from myelin fibers by that  
222 of the surrounding tissue.

## 223 Fluorescence spectral measurements

224 The multimodal microscope, set at an excitation wavelength of 800 nm, was used to perform the spectral  
225 analysis measurements. Autofluorescence signals were collected during the three conditions of the protocol  
226 (N=1 sample for each step). The collected fluorescence signal was coupled to a multimode optical fiber by  
227 means of a 10 $\times$  objective lens (Nikon, Tokyo, Japan) and detected in the 420-620 nm range using a  
228 multispectral detector PML-Spec (Becker-Hickl GmbH, Berlin, Germany) with 16 spectral channels. Each  
229 channel recorded a fluorescence intensity image in 90 s, from which we selected regions of interest (ROIs)

230 corresponding to the myelin sheath (N=3) and the surrounding brain tissue (N=3) in order to analyze the  
231 intensity of their fluorescence emission separately.

## 232 Raman measurements

233 We used a commercial Raman microscope (XploRA INV, Horiba, Kyoto, Japan) with  $\lambda_{EX} = 532$  nm for collecting  
234 the Raman spectra of mouse brain tissues during the three conditions of the protocol on both the myelin  
235 sheath and the surrounding tissue (N=4 samples for each step). For each acquisition, we used a 60× objective  
236 (Nikon, Tokyo, Japan) for scanning a 10- $\mu$ m-area while recording the Raman signal between 400 and 1750  
237  $cm^{-1}$  with 1800 lines/mm grating: each measurement lasted 30 s. The recorded spectra were processed to  
238 remove the fluorescence signal through an automated iterative routine (Vancouver Raman Algorithm). Each  
239 resulting Raman spectrum was normalized to its maximum intensity. Then, in order to evaluate the glycerol  
240 content within the examined tissue areas, we performed a spectral projection of all Raman spectra along  
241 with three major bands (550, 850 and 1465  $cm^{-1}$ ) of glycerol; in particular, we calculated the scalar product  
242 between the spectra and the Raman peaks recorded from the glycerolized mounting medium solution. From  
243 that, for each spectrum, we obtained a score ("glycerol score") equal to 1 for glycerolized tissues and <1  
244 otherwise.

## 245 Data analysis

246 Graphs and statistical analyses were done with OriginPro 9.0 (OriginLab Corporation) and  
247 [www.socscistatistics.com](http://www.socscistatistics.com). Mean and standard errors are displayed for each chart. Statistical analyses were  
248 performed using a one-tailed two-sample t-test. For the mean lifetime measurement the p-value (p), Cohen's  
249 d (d), degrees of freedom (DF), and mean difference (m)  $\pm$  confidence interval (CI) at 95% are: PFA fiber vs  
250 PFA tissue: p = 0.00028, d = 1.872, DF = 18, m+95% CI = 98  $\pm$  49; Gly fiber vs Gly tissue: p = 0.00041, d =  
251 1.653, DF = 20, m+95% CI = 109  $\pm$  58; Magic fiber vs Magic tissue: p = 0.00009, d = 2.493, DF = 14, m+95%  
252 CI = 150  $\pm$  64. For the Magic fiber vs Magic tissue glycerol-score evaluation: p = 0.0173, d = 1.923, DF = 6, m+  
253 95% CI = 0.06  $\pm$  0.05. Stacks and 3D stitched volume renderings and videos were obtained using both Fiji  
254 (<http://fiji.sc/Fiji>) and Amira 5.3 (Visage Imaging).

## 255 Structure tensor analysis (STA) evaluation

256 Following the preprocessing operations detailed in the Supplementary information, a structure tensor  
257 analysis (STA) was conducted at 5  $\mu\text{m}$  spatial resolution on the whole mesoscale reconstruction of the  
258 hippocampus and separately on the selected ROIs (Figure 2 and Supplementary Fig.6) for estimating the local  
259 brain tissue orientation. To this end, we employed a custom STA tool developed by our laboratory in the  
260 framework of the European Human Brain Project. The source code of the present tool, written in Python3,  
261 can be accessed at: [https://github.com/lens-biophotonics/st\\_fibre\\_analysis\\_hbp](https://github.com/lens-biophotonics/st_fibre_analysis_hbp).

262 In order to reject background and spurious dark regions, retaining only the contribution of brain structures,  
263 and improve the reliability of the obtained vector fields, a threshold of 85% non-zero voxels was imposed  
264 beforehand on each 5- $\mu\text{m}$  macro-voxel to be characterized.

265 In detail, local gradient-square tensors were first computed as the outer product of the image gradient  $\nabla I$   
266 with itself:

$$267 \quad S_v(x, y, z) = \nabla I \nabla I^T = \begin{pmatrix} I_x^2 & I_x I_y & I_x I_z \\ I_x I_y & I_y^2 & I_y I_z \\ I_x I_z & I_y I_z & I_z^2 \end{pmatrix},$$

268 where  $I_x$ ,  $I_y$  and  $I_z$  respectively denote the local first-order spatial derivatives along the x, y, and z axes.  
269 Tensor elements estimated voxel-wise were then averaged over 5- $\mu\text{m}$  local neighborhoods after isotropic  
270 smoothing by means of Gaussian kernels  $g_{\sigma_s}$  with standard deviation  $\sigma_s = 3$  pixel.

271 3D tissue orientation maps were finally derived from the local directions of minimal gray level change, i.e.  
272 the eigenvector of the averaged structure tensor  $\bar{S}_{\sigma_s}$  associated with the lowest eigenvalue.

## 273 Orientation Distribution Functions (ODF) calculation

274 Fiber orientation distribution functions (ODFs) were used to characterize a given distribution of 3D  
275 orientations, i.e., nerve fibers. To calculate the ODF of a given number of K orientation vectors, the individual  
276 spherical harmonic (SH) coefficients  $c_{lm}$  of the ODF were estimated as  $c_{lm} = \frac{N_l^m}{K} \sum_{k=1}^K P_l^m(\cos(\theta_k)) e^{-im\varphi_k}$   
277 with  $N_l^m$  as the normalization coefficient,  $P_l^m$  as Legendre polynomials,  $\varphi$  as azimuthal, and  $\theta$  as the polar  
278 angle. This calculation was applied to the orientations obtained in a super-voxel consisting of  $n_x \times n_y \times n_z$

279 voxels. In particular, to represent the ODFs of figure 2q and 2r a super voxel of 16 x 16 x 8 vectors,  
280 corresponding to a cube of 80 x 80 x 40  $\mu\text{m}$ , was selected; while to obtain the total ODF of the full  
281 reconstruction and of the selected ROIs (represented in figure 2s), all the vectors present in the section were  
282 considered. The visualization of the ODFs was done with the open-source tool mrview from MRtrix3<sup>17</sup>. To  
283 avoid boundary artefacts, only super-voxels containing at least 1/3 of the total evaluated orientations were  
284 shown. The size of the ODFs was scaled by a factor of 2 to improve their visibility. Next, the MRtrix3 sh2peaks  
285 tool was applied to the obtained SH images in order to extract the Cartesian components of the three  
286 principal ODF lobes and, then, determine their amplitude (Euclidean norm). At this stage, amplitude values  
287 below 50% of the largest peak of the ODF were discarded, with the aim to exclude minor maxima related to  
288 noise from further consideration.

## 289 Acknowledgments

290 We thank Markus Cremer, INM-1, Forschungszentrum Jülich, Germany for brain tissue sectioning and  
291 mounting. The research leading to these results has received funding from the European Union's Horizon  
292 2020 Framework Programme for Research and Innovation under the Specific Grant Agreement No. 785907  
293 (Human Brain Project SGA2) and No. 945539 (Human Brain Project SGA3). This research has also been  
294 supported by the Massachusetts General Hospital (The General Hospital Corporation), Athinoula A. Martinos  
295 Center, The National Institute of Mental Health (NIMH) through the BRAIN Initiative Cell Census Network  
296 under award number 1U01MH117023-01, by the Italian Ministry for Education, University, and Research in  
297 the framework of the Eurobioimaging Italian Nodes (ESFRI research infrastructure) - Advanced Light  
298 Microscopy Italian Node, and by "Ente Cassa di Risparmio di Firenze" (private foundation) n.24135. The  
299 content is solely the responsibility of the authors and does not necessarily represent the official views of the  
300 National Institutes of Health.

## 301 Author contributions

302 I.C. developed MAGIC, designed all the experiments, performed sample preparation, and conducted TPFM  
303 imaging. I.C and E.B performed the validation experiments. E.B and R.C analyzed the validation data. G.M  
304 developed the ZetaStitcher software and performed the mesoscopic reconstruction. F.G wrote the STA  
305 software. M.S evaluated the mesoscopic reconstruction with the STA software. F.M, M.M, and M.A  
306 effectuated the ODFs analysis. K.A and M.A provided the tissue specimens and contributed to the concept of  
307 the study. I.C, L.S, M.A, K.A, and F.S.P. supervised the project. I.C. made the figures and wrote the paper with  
308 inputs from all authors.

## 309 Competing financial interests

310 The authors declare that they have no competing financial interests.

## 311 Data availability

312 All data supporting the findings of this study are included in figures and videos as representative images or  
313 data points in the plots. Additional images other than the representative images are available from the  
314 corresponding author upon reasonable request.

## 315 Code availability

316 MRtrix3 is an open source tool; ZetaStitcher and STA codes are open source and available on GitHub at URLs  
317 provided in the Methods. The other custom code used in this study are available from the corresponding  
318 author upon reasonable request.

## 319 References

- 320 1 Aggarwal, S., Yurlova, L. & Simons, M. Central nervous system myelin: structure, synthesis and  
321 assembly. *Trends Cell Biol* **21**, 585-593, doi:10.1016/j.tcb.2011.06.004 (2011).
- 322 2 Giacci, M. K. *et al.* Three dimensional electron microscopy reveals changing axonal and myelin  
323 morphology along normal and partially injured optic nerves. *Scientific reports* **8**, 3979,  
324 doi:10.1038/s41598-018-22361-2 (2018).
- 325 3 Heath, F., Hurley, S. A., Johansen-Berg, H. & Sampaio-Baptista, C. Advances in noninvasive myelin  
326 imaging. *Dev Neurobiol* **78**, 136-151, doi:10.1002/dneu.22552 (2018).
- 327 4 Hajjar, H. *et al.* Label-free non-linear microscopy to measure myelin outcome in a rodent model of  
328 Charcot-Marie-Tooth diseases. *J Biophotonics* **11**, e201800186, doi:10.1002/jbio.201800186 (2018).
- 329 5 Lai, H. M., Ng, W. L., Gentleman, S. M. & Wu, W. Chemical Probes for Visualizing Intact Animal and  
330 Human Brain Tissue. *Cell Chem Biol* **24**, 659-672, doi:10.1016/j.chembiol.2017.05.015 (2017).
- 331 6 Costantini, I., Cicchi, R., Silvestri, L., Vanzi, F. & Pavone, F. S. In-vivo and ex-vivo optical clearing  
332 methods for biological tissues: review. *Biomed Opt Express* **10**, 5251-5267,  
333 doi:10.1364/BOE.10.005251 (2019).
- 334 7 Monsma, P. C. & Brown, A. FluoroMyelin Red is a bright, photostable and non-toxic fluorescent  
335 stain for live imaging of myelin. *J Neurosci Methods* **209**, 344-350,  
336 doi:10.1016/j.jneumeth.2012.06.015 (2012).
- 337 8 Becker, W. Fluorescence lifetime imaging--techniques and applications. *J Microsc* **247**, 119-136,  
338 doi:10.1111/j.1365-2818.2012.03618.x (2012).
- 339 9 Morisaki, S. *et al.* Application of Raman spectroscopy for visualizing biochemical changes during  
340 peripheral nerve injury in vitro and in vivo. *J Biomed Opt* **18**, 116011,  
341 doi:10.1117/1.JBO.18.11.116011 (2013).
- 342 10 Ledeen, R. W. & Haley, J. E. Axon-myelin transfer of glycerol-labeled lipids and inorganic phosphate  
343 during axonal transport. *Brain Res* **269**, 267-275, doi:10.1016/0006-8993(83)90136-1 (1983).
- 344 11 Terman, A. & Brunk, U. T. Lipofuscin. *Int J Biochem Cell Biol* **36**, 1400-1404,  
345 doi:10.1016/j.biocel.2003.08.009 (2004).
- 346 12 Deller, T. *et al.* The hippocampus of the reeler mutant mouse: fiber segregation in area CA1  
347 depends on the position of the postsynaptic target cells. *Exp Neurol* **156**, 254-267,  
348 doi:10.1006/exnr.1999.7021 (1999).
- 349 13 Lossi, L., Castagna, C., Granato, A. & Merighi, A. The Reeler Mouse: A Translational Model of Human  
350 Neurological Conditions, or Simply a Good Tool for Better Understanding Neurodevelopment? *J Clin*  
351 *Med* **8**, doi:10.3390/jcm8122088 (2019).



- 352 14 Kowalski, W. J. *et al.* Quantification of Cardiomyocyte Alignment from Three-Dimensional (3D)  
353 Confocal Microscopy of Engineered Tissue. *Microsc Microanal* **23**, 826-842,  
354 doi:10.1017/S1431927617000666 (2017).
- 355 15 Axer, M. *et al.* Estimating Fiber Orientation Distribution Functions in 3D-Polarized Light Imaging.  
356 *Front Neuroanat* **10**, 40, doi:10.3389/fnana.2016.00040 (2016).
- 357 16 Marchetti, M., Baria, E., Cicchi, R. & Pavone, F. S. Custom Multiphoton/Raman Microscopy Setup  
358 for Imaging and Characterization of Biological Samples. *Methods Protoc* **2**,  
359 doi:10.3390/mps2020051 (2019).
- 360 17 Tournier, J. D. *et al.* MRtrix3: A fast, flexible and open software framework for medical image  
361 processing and visualisation. *Neuroimage* **202**, 116137, doi:10.1016/j.neuroimage.2019.116137  
362 (2019).
- 363
